# Supplementary material
Source: MDPI journal article supplement (https://www.mdpi.com/2673-8007/1/2/13)
Supplement: s1 [file s1]

Supplementary Table 1. Differentially abundant fungal taxa at the genus level ( $p < 0.05$ ) as per DESeq2. The mean relative abundance column represents the mean rarefied abundance across all soil samples. Change ( $\log_2$  fold) indicates the multiplicative change in taxon abundance between soil origins. Negative numbers indicate association with bulk samples, and positive numbers indicate association with rhizosphere samples. The adjusted p-value column show the FDR corrected p-value. Each indicator taxa also includes FUNGuild assignment for trophic mode and guild. The level at which the guild and trophic mode assignment was made is reported in the Level

| Mean Relative Abundance | Change ( $\log_2$ Fold) | Association | Adjusted $p$ -value | Taxonomy                                                                         | Level of guild assignment | Trophic Mode assignment           | Guild Assignment                                                                         |
|-------------------------|-------------------------|-------------|---------------------|----------------------------------------------------------------------------------|---------------------------|-----------------------------------|------------------------------------------------------------------------------------------|
| 45.93554454             | -<br>5.352948395        | Bulk        | 0.0221246           | Ascomycota;Dothideomycetes;Pleosporales;Phaeosphaeriaceae;Ophiosphaerella        | Ophiosphaerella           | Saprotroph                        | Undefined Saprotroph                                                                     |
| 101.468543              | -<br>0.893293861        | Bulk        | 0.0243643           | Ascomycota;Dothideomycetes;Pleosporales;Torulaceae;Dendryphion                   | Dendryphion               | Pathotroph                        | Plant Pathogen                                                                           |
| 18.41881538             | -<br>7.095314948        | Bulk        | 0.0024926           | Ascomycota;Eurotiomycetes;Onygenales;Onygenales_fam_Incertae_sedis;Chrysosporium | NA                        | NA                                | NA                                                                                       |
| 12.95772077             | -3.38778474             | Bulk        | 0.0216973           | Ascomycota;Pezizomycetes;Pezizales;Ascobolaceae;Ascobolus                        | Ascobolaceae              | Saprotroph                        | Dung Saprotroph-Soil Saprotroph-Wood Saprotroph                                          |
| 4357.721813             | -<br>1.687321829        | Bulk        | 0.0216973           | Ascomycota;Pezizomycetes;Pezizales;Pyronemataceae;Kotlabaea                      | Kotlabaea                 | Saprotroph                        | Undefined Saprotroph                                                                     |
| 31.02619535             | -7.67210468             | Bulk        | 0.0243643           | Ascomycota;Pezizomycetes;Pezizales;Pyronemataceae;Pseudaleuria                   | Pseudaleuria              | Saprotroph                        | Undefined Saprotroph                                                                     |
| 1697.29219              | -0.9923871              | Bulk        | 0.0221246           | Ascomycota;Sordariomycetes;Sordariales;Chaetomiaceae;Botryotrichum               | Botryotrichum             | Saprotroph                        | Undefined Saprotroph                                                                     |
| 493.8889389             | 2.361508735             | Rhizosphere | 3.13E-05            | Ascomycota;Dothideomycetes;Pleosporales;Phaeosphaeriaceae;Setophoma              | Phaeosphaeriaceae         | Pathotroph-Saprotroph             | Fungal Parasite-Plant Pathogen-Plant Saprotroph                                          |
| 526.9315674             | 3.040481782             | Rhizosphere | 0.0020997           | Ascomycota;Sordariomycetes;Hypocreales;Nectriaceae;Ilyonectria                   | Ilyonectria               | Pathotroph                        | Plant Pathogen                                                                           |
| 11.64539771             | 22.35517446             | Rhizosphere | 3.27E-12            | Ascomycota;Sordariomycetes;Hypocreales;Nectriaceae;Volutella                     | Nectriaceae               | Pathotroph-Saprotroph-Symbiotroph | Animal Pathogen-Endophyte-Fungal Parasite-Lichen Parasite-Plant Pathogen-Wood Saprotroph |
| 17.18429639             | 8.003845695             | Rhizosphere | 0.0070517           | Ascomycota;Sordariomycetes;Xylariales;Diatrypaceae;Monosporascus                 | Diatrypaceae              | Pathotroph-Saprotroph             | Plant Pathogen-Plant Saprotroph                                                          |
| 96.74783218             | 25.30799831             | Rhizosphere | 2.08E-15            | Basidiomycota;Agaricomycetes;Polyporales;Meruliaceae;Uncobasidium                | Meruliaceae               | Pathotroph-Saprotroph             | Plant Pathogen-Undefined Saprotroph                                                      |

of Guild Assignment column.

Supplementary Table 2. Differentially abundant bacterial taxa at the genus level ( $p < 0.01$ ) as per DESeq2. The mean relative abundance column represents the mean rarefied abundance across all soil samples. Change (Log<sub>2</sub> fold) indicates the multiplicative change in taxon abundance between soil origins. Negative numbers indicate association with bulk samples, and positive numbers indicate association with rhizosphere samples. The adjusted p-value column show the FDR corrected p-value.

| Mean Relative Abundance | Change (log <sub>2</sub> Fold) | Association | Adjusted p-value | Taxonomy                                                                                      |
|-------------------------|--------------------------------|-------------|------------------|-----------------------------------------------------------------------------------------------|
| 16.5990731              | -<br>2.43853437                | Bulk        | 0.00082594       | Bacteria;Abditibacteriota;Abditibacteria;Abditibacteriales;Abditibacteriaceae;Abditibacterium |
| 173.124814              | -<br>1.02804751                | Bulk        | 1.88E-10         | Bacteria;Acidobacteriota;Acidobacteriae;Bryobacteriales;Bryobacteraceae;Bryobacter            |
| 88.2990841              | -<br>1.13900204                | Bulk        | 5.96E-05         | Bacteria;Acidobacteriota;Blastocatellia;Blastocatellales;Blastocatellaceae;Aridibacter        |
| 71.1417166              | -<br>1.14680476                | Bulk        | 0.00016822       | Bacteria;Acidobacteriota;Blastocatellia;Blastocatellales;Blastocatellaceae;Blastocatella      |
| 128.505259              | -<br>1.91828171                | Bulk        | 8.49E-05         | Bacteria;Acidobacteriota;Blastocatellia;Blastocatellales;Blastocatellaceae;JGI_0001001-H03    |
| 452.304907              | -<br>1.95862956                | Bulk        | 1.75E-19         | Bacteria;Acidobacteriota;Blastocatellia;Blastocatellales;Blastocatellaceae;Stenotrophobacter  |
| 1432.09311              | -<br>1.60294531                | Bulk        | 1.14E-19         | Bacteria;Acidobacteriota;Blastocatellia;Pyrinomonadales;Pyrinomonadaceae;RB41                 |
| 5.67920713              | -<br>5.62019746                | Bulk        | 0.00609602       | Bacteria;Actinobacteriota;Actinobacteria;Micromonosporales;Micromonosporaceae;Luedemannella   |
| 96.1291365              | -<br>1.35987792                | Bulk        | 0.00016142       | Bacteria;Bacteroidota;Bacteroidia;Chitinophagales;Chitinophagaceae;Ferruginibacter            |
| 6.90057196              | -<br>5.91207244                | Bulk        | 0.00316018       | Bacteria;Bacteroidota;Bacteroidia;Chitinophagales;Chitinophagaceae;Flaviaesturariibacter      |
| 134.447504              | -<br>1.31567627                | Bulk        | 2.67E-05         | Bacteria;Bacteroidota;Bacteroidia;Chitinophagales;Chitinophagaceae;Flavisolibacter            |
| 44.2320779              | -<br>1.40440935                | Bulk        | 1.74E-05         | Bacteria;Bacteroidota;Bacteroidia;Chitinophagales;Chitinophagaceae;Flavitalea                 |
| 8.35668484              | -<br>4.45561712                | Bulk        | 0.001011         | Bacteria;Bacteroidota;Bacteroidia;Chitinophagales;Chitinophagaceae;Segetibacter               |
| 378.019279              | -<br>0.62127527                | Bulk        | 0.00447463       | Bacteria;Bacteroidota;Bacteroidia;Cytophagales;Hymenobacteraceae;Adhaeribacter                |
| 8.70722565              | -<br>3.08514323                | Bulk        | 0.00238726       | Bacteria;Fibrobacterota;Fibrobacteria;Fibrobacteriales;Fibrobacteraceae;possible_genus_04     |
| 57.4157409              | -2.1439789                     | Bulk        | 0.00083491       | Bacteria;Gemmatimonadota;Gemmatimonadetes;Gemmatimonadales;Gemmatimonadaceae;Gemmatimonas     |
| 3.97240178              | -<br>5.11472721                | Bulk        | 0.00638642       | Bacteria;Gemmatimonadota;Gemmatimonadetes;Gemmatimonadales;Gemmatimonadaceae;Roseisolibacter  |
| 82.694573               | -<br>0.90592921                | Bulk        | 5.96E-05         | Bacteria;Nitrospirota;Nitrospiria;Nitrospirales;Nitrospiraceae;Nitrospira                     |

|            |                 |             |            |                                                                                                           |
|------------|-----------------|-------------|------------|-----------------------------------------------------------------------------------------------------------|
| 505.576938 | -<br>0.70723879 | Bulk        | 0.00831063 | Bacteria;Planctomycetota;Planctomycetes;Pirellulales;Pirellulaceae;Pir4_lineage                           |
| 319.379023 | -<br>0.90940169 | Bulk        | 0.00015772 | Bacteria;Planctomycetota;Planctomycetes;Pirellulales;Pirellulaceae;Pirellula                              |
| 267.155109 | -<br>1.61492607 | Bulk        | 2.36E-07   | Bacteria;Proteobacteria;Gammaproteobacteria;Burkholderiales;Nitrosomonadaceae;Nitrospira                  |
| 20.8249213 | -<br>2.55881307 | Bulk        | 0.00088846 | Bacteria;Verrucomicrobiota;Verrucomicrobiae;Chthoniobacterales;Chthoniobacteraceae;Candidatus_Udaeobacter |
| 133.57254  | -<br>0.86922509 | Bulk        | 0.00091493 | Bacteria;Verrucomicrobiota;Verrucomicrobiae;Opitutales;Opitutaceae;Opitutus                               |
| 36.5616111 | -<br>1.43494794 | Bulk        | 1.85E-05   | Bacteria;Verrucomicrobiota;Verrucomicrobiae;Pedosphaerales;Pedosphaeraceae;ADurb.Bin063-1                 |
| 60.5821759 | 0.9884899       | Rhizosphere | 0.00061545 | Bacteria;Acidobacteriota;Vicinamibacteria;Vicinamibacterales;Vicinamibacteraceae;Luteitalea               |
| 70.8146534 | 5.85428784      | Rhizosphere | 1.72E-20   | Bacteria;Actinobacteriota;Actinobacteria;Glycomycetales;Glycomycetaceae;Glycomyces                        |
| 14.9506489 | 4.45974544      | Rhizosphere | 0.00467375 | Bacteria;Actinobacteriota;Actinobacteria;Micrococcales;Intrasporangiaceae;Intrasporangium                 |
| 80.1083805 | 1.82716549      | Rhizosphere | 1.48E-06   | Bacteria;Actinobacteriota;Actinobacteria;Micrococcales;Microbacteriaceae;Agromyces                        |
| 76.0495264 | 4.35149389      | Rhizosphere | 5.73E-10   | Bacteria;Actinobacteriota;Actinobacteria;Micrococcales;Promicromonosporaceae;Promicromonospora            |
| 137.149452 | 0.96567871      | Rhizosphere | 0.00366405 | Bacteria;Actinobacteriota;Actinobacteria;Micromonosporales;Micromonosporaceae;Actinoplanes                |
| 123.962052 | 3.28146781      | Rhizosphere | 3.03E-22   | Bacteria;Actinobacteriota;Actinobacteria;Propionibacterales;Nocardiodaceae;Aeromicrobium                  |
| 32.3641723 | 2.33668169      | Rhizosphere | 5.15E-05   | Bacteria;Actinobacteriota;Actinobacteria;Propionibacterales;Nocardiodaceae;Kribbella                      |
| 198.489269 | 1.7715479       | Rhizosphere | 1.24E-07   | Bacteria;Actinobacteriota;Actinobacteria;Propionibacterales;Nocardiodaceae;Nocardioides                   |
| 24.988121  | 6.53596015      | Rhizosphere | 6.07E-11   | Bacteria;Actinobacteriota;Actinobacteria;Pseudonocardiales;Pseudonocardiaceae;Amycolatopsis               |
| 57.1415724 | 3.11737148      | Rhizosphere | 0.00069013 | Bacteria;Actinobacteriota;Actinobacteria;Pseudonocardiales;Pseudonocardiaceae;Kibdelosporangium           |
| 537.610521 | 6.26470357      | Rhizosphere | 1.93E-20   | Bacteria;Actinobacteriota;Actinobacteria;Pseudonocardiales;Pseudonocardiaceae;Lechevalieria               |
| 849.189235 | 5.42264207      | Rhizosphere | 1.77E-65   | Bacteria;Actinobacteriota;Actinobacteria;Streptomycetales;Streptomycetaceae;Streptomyces                  |
| 84.1258478 | 3.30670121      | Rhizosphere | 4.39E-08   | Bacteria;Actinobacteriota;Actinobacteria;Streptosporangiales;Streptosporangiaceae;Nonomuraea              |
| 8.06543724 | 5.93963893      | Rhizosphere | 2.01E-05   | Bacteria;Bacteroidota;Bacteroidia;Chitinophagales;Chitinophagaceae;Taibaiella                             |
| 26.0608903 | 1.99766363      | Rhizosphere | 2.17E-06   | Bacteria;Bacteroidota;Bacteroidia;Cytophagales;Cytophagaceae;Rhodocytophaga                               |
| 92.957892  | 0.88391457      | Rhizosphere | 0.00727113 | Bacteria;Bacteroidota;Bacteroidia;Cytophagales;Microscillaceae;Ohtaekwangia                               |
| 31.873766  | 6.05934747      | Rhizosphere | 1.13E-07   | Bacteria;Bacteroidota;Bacteroidia;Cytophagales;Spirosomaceae;Dyadobacter                                  |
| 14.616628  | 3.84426618      | Rhizosphere | 0.00459442 | Bacteria;Bacteroidota;Bacteroidia;Flavobacteriales;Crocinitomicaceae;Fluviicola                           |
| 75.3022863 | 2.62824733      | Rhizosphere | 5.77E-09   | Bacteria;Bacteroidota;Bacteroidia;Flavobacteriales;Flavobacteriaceae;Flavobacterium                       |
| 48.313255  | 1.77982734      | Rhizosphere | 6.00E-06   | Bacteria;Chloroflexi;Chloroflexia;Chloroflexales;Herpetosiphonaceae;Herpetosiphon                         |
| 3.00637059 | 5.32206763      | Rhizosphere | 0.00771937 | Bacteria;Proteobacteria;Alphaproteobacteria;Caulobacterales;Caulobacteraceae;Asticcacaulis                |
| 42.7419798 | 1.83368049      | Rhizosphere | 0.00638642 | Bacteria;Proteobacteria;Alphaproteobacteria;Caulobacterales;Caulobacteraceae;Brevundimonas                |
| 69.9961165 | 3.45379239      | Rhizosphere | 7.86E-05   | Bacteria;Proteobacteria;Alphaproteobacteria;Caulobacterales;Caulobacteraceae;Caulobacter                  |

|            |            |             |            |                                                                                                                         |
|------------|------------|-------------|------------|-------------------------------------------------------------------------------------------------------------------------|
| 274.490404 | 3.25705776 | Rhizosphere | 2.15E-22   | Bacteria;Proteobacteria;Alphaproteobacteria;Rhizobiales;Devosiaceae;Devosia                                             |
| 85.9447005 | 2.62088572 | Rhizosphere | 5.77E-09   | Bacteria;Proteobacteria;Alphaproteobacteria;Rhizobiales;Rhizobiaceae;Allorhizobium-Neorhizobium-Pararhizobium-Rhizobium |
| 18.5553214 | 4.32706807 | Rhizosphere | 2.82E-05   | Bacteria;Proteobacteria;Alphaproteobacteria;Rhizobiales;Rhizobiaceae;Ensifer                                            |
| 74.8479037 | 1.17969897 | Rhizosphere | 0.00110086 | Bacteria;Proteobacteria;Alphaproteobacteria;Sphingomonadales;Sphingomonadaceae;Altererythrobacter                       |
| 68.7278206 | 3.49560919 | Rhizosphere | 2.48E-06   | Bacteria;Proteobacteria;Alphaproteobacteria;Sphingomonadales;Sphingomonadaceae;Sphingobium                              |
| 38.1178609 | 6.06235177 | Rhizosphere | 6.87E-09   | Bacteria;Proteobacteria;Gammaproteobacteria;Burkholderiales;Comamonadaceae;Variovorax                                   |
| 15.5622734 | 3.19582413 | Rhizosphere | 0.00365348 | Bacteria;Proteobacteria;Gammaproteobacteria;Burkholderiales;Methylophilaceae;Methylobacillus                            |
| 15.6741545 | 7.70611953 | Rhizosphere | 0.00013009 | Bacteria;Proteobacteria;Gammaproteobacteria;Burkholderiales;Oxalobacteraceae;Duganella                                  |
| 245.890554 | 2.90777435 | Rhizosphere | 2.17E-19   | Bacteria;Proteobacteria;Gammaproteobacteria;Burkholderiales;Oxalobacteraceae;Massilia                                   |
| 10.1593637 | 7.07698393 | Rhizosphere | 3.05E-05   | Bacteria;Proteobacteria;Gammaproteobacteria;Burkholderiales;Oxalobacteraceae;Pseudoduganella                            |
| 81.2346808 | 2.49485057 | Rhizosphere | 3.14E-05   | Bacteria;Proteobacteria;Gammaproteobacteria;Cellvibrionales;Cellvibrionaceae;Cellvibrio                                 |
| 117.752469 | 1.57490743 | Rhizosphere | 6.87E-09   | Bacteria;Proteobacteria;Gammaproteobacteria;Pseudomonadales;Pseudomonadaceae;Pseudomonas                                |
| 132.703812 | 2.19836499 | Rhizosphere | 5.77E-09   | Bacteria;Proteobacteria;Gammaproteobacteria;Xanthomonadales;Xanthomonadaceae;Arenimonas                                 |
| 77.2563267 | 5.06644133 | Rhizosphere | 1.93E-07   | Bacteria;Proteobacteria;Gammaproteobacteria;Xanthomonadales;Xanthomonadaceae;Luteimonas                                 |
| 92.4938038 | 3.51752566 | Rhizosphere | 5.73E-10   | Bacteria;Proteobacteria;Gammaproteobacteria;Xanthomonadales;Xanthomonadaceae;Pseudoxanthomonas                          |
| 27.1330252 | 2.95612119 | Rhizosphere | 0.00366405 | Bacteria;Verrucomicrobiota;Verrucomicrobiae;Opitutales;Opitutaceae;Lacunisphaera                                        |
| 153.811853 | 1.97536577 | Rhizosphere | 5.28E-05   | Bacteria;Verrucomicrobiota;Verrucomicrobiae;Verrucomicrobiales;Rubritaleaceae;Luteolibacter                             |

---
